# Supplementary material
Source: PubMed Central journal article supplement (PMC3276663)
Supplement: mmc1.pdf [file mmc1.pdf]

## Supplemental Data

### The Arabian Cradle: Mitochondrial Relicts of the First Steps along the Southern Route out of Africa

Verónica Fernandes, Farida Alshamali, Marco Alves, Marta D. Costa, Joana B. Pereira, Nuno M. Silva, Lotfi Cherni, Nourdin Harich, Viktor Cerny, Pedro Soares, Martin B. Richards, and Luísa Pereira

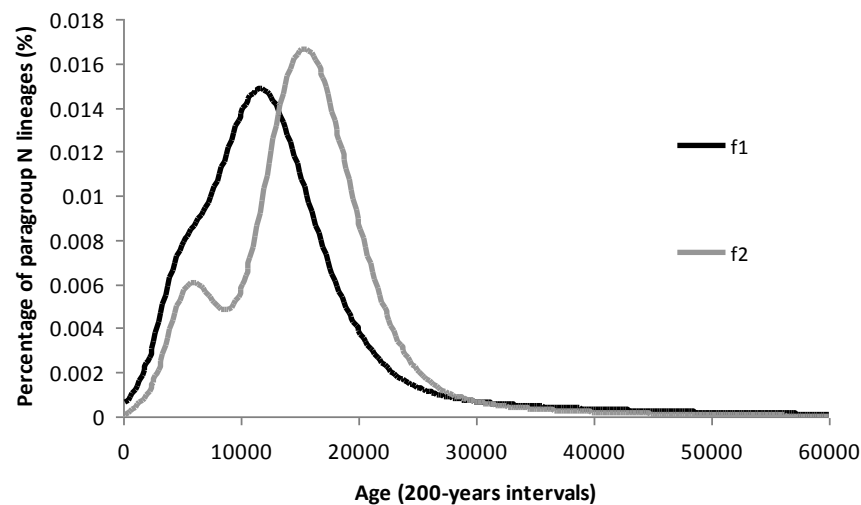

Figure S1. Probabilistic Distribution of Founder Clusters across Migration Times Scanned at 200 yr Intervals from 0–60 ka, Using Both an *f1* Criterion (Black Line) and an *f2* Criterion (Grey Line) When Considering a Migration from the Near East to Europe

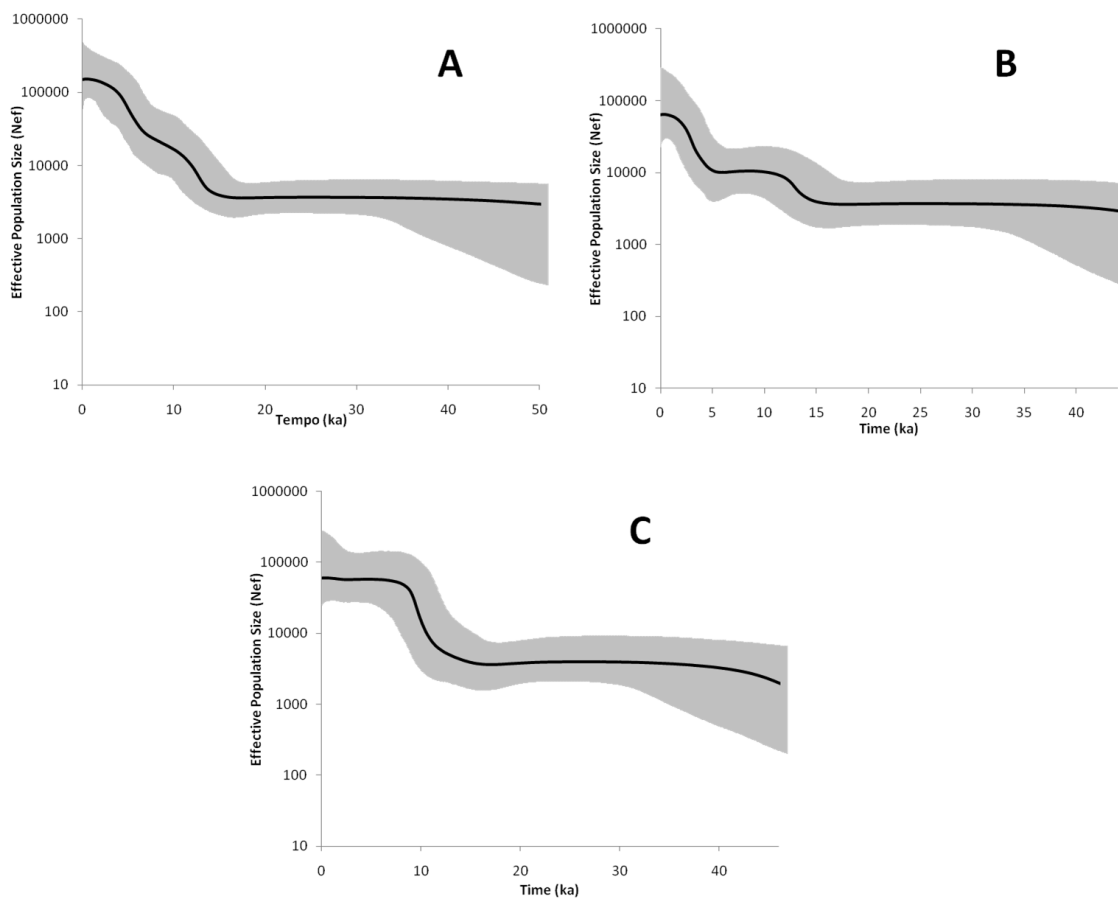

Figure S2. Bayesian Skyline Plot Indicating Hypothetical Effective Population Size through Time Based on Data from the Entire Dataset (A), only Europe (B), and Near East, Arabian Peninsula and Caucasus (C)

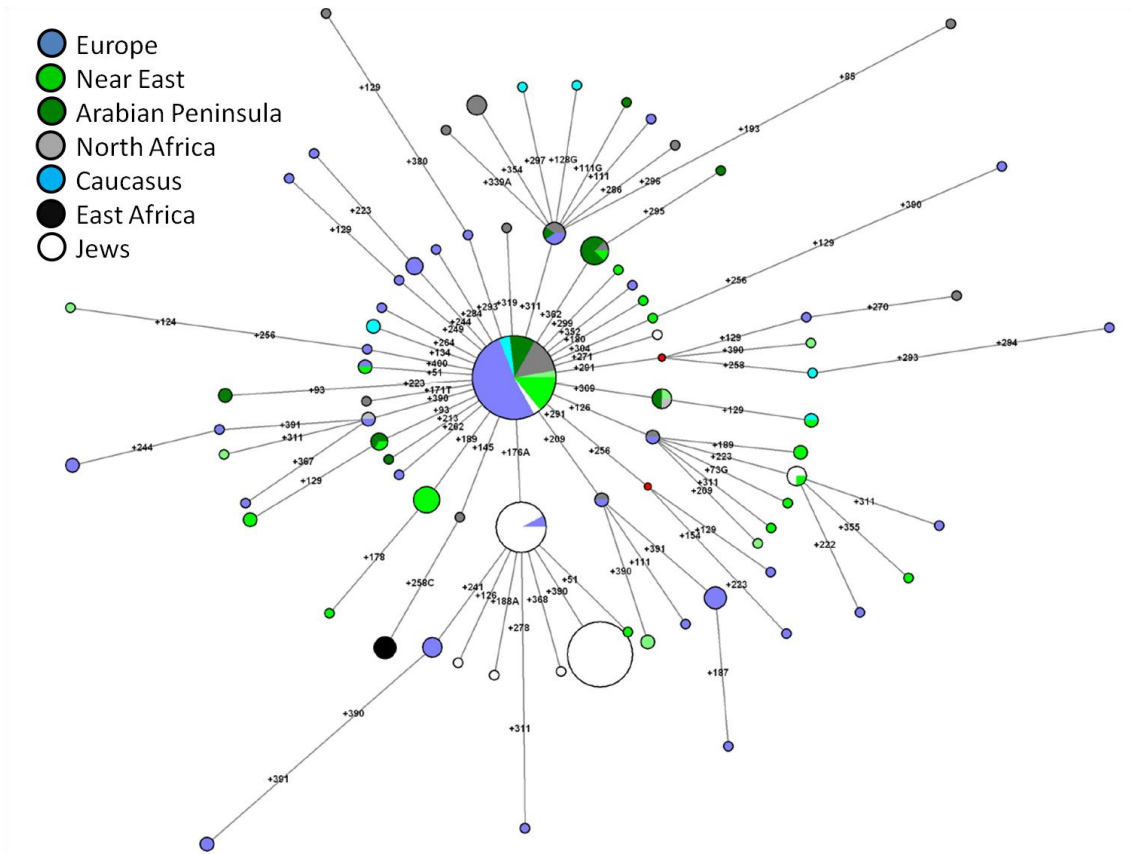

Figure S3. HVS-I Network of Haplogroup N1b

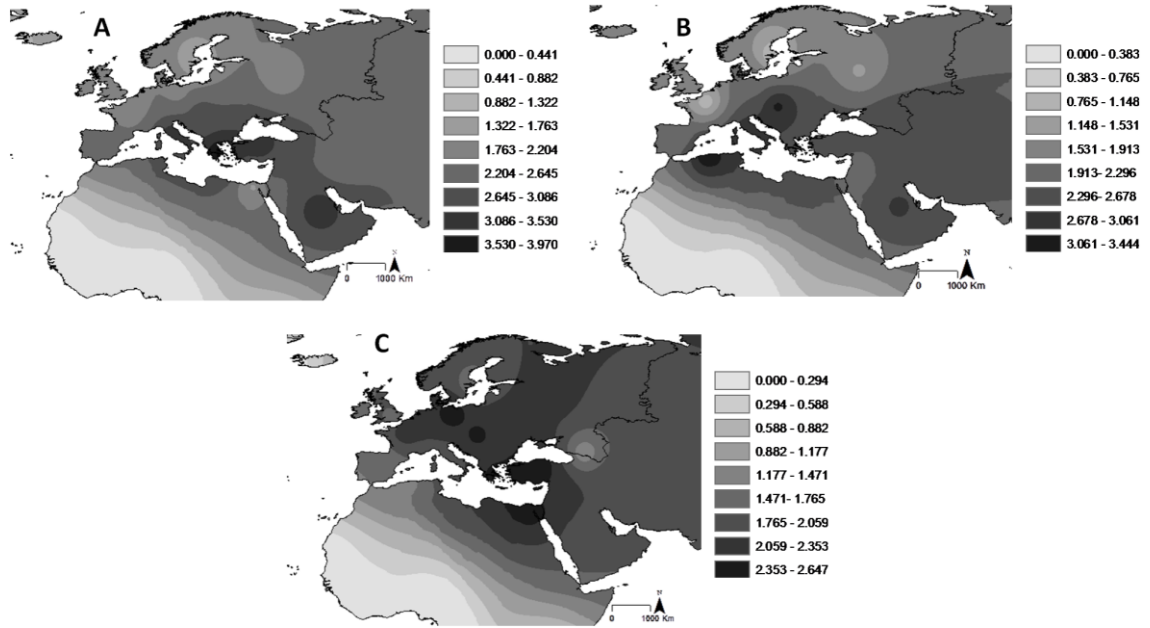

Figure S4. Distribution Maps for the Diversity Measure  $\pi$  Based on HVS-I Data for Haplogroups I (A), W (B), and X (C)

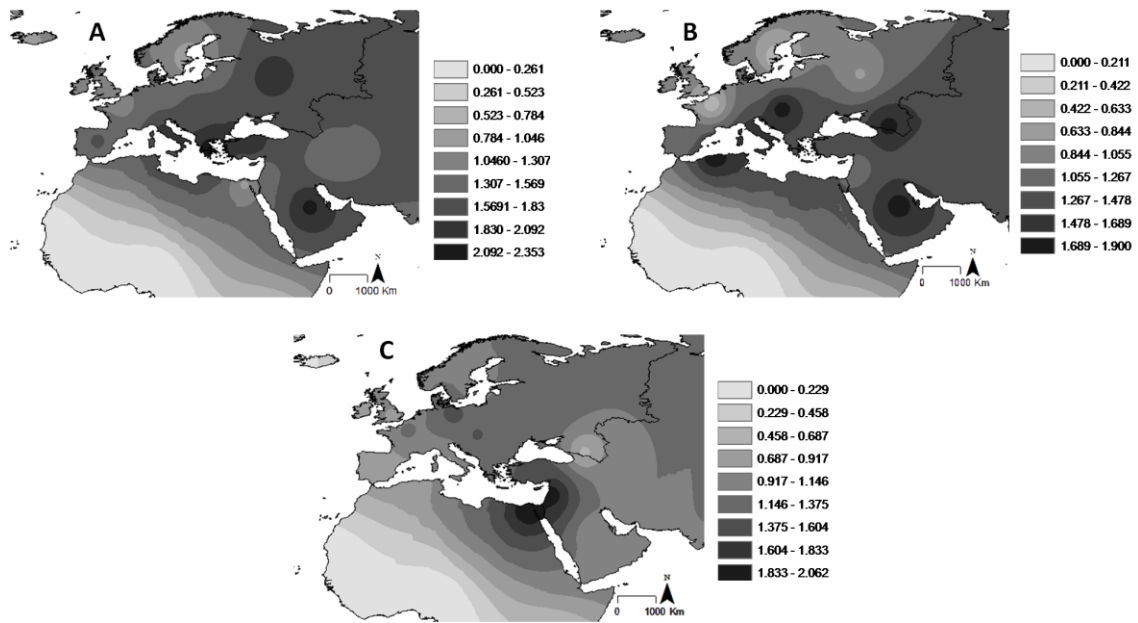

Figure S5. Distribution Maps for the Diversity Measure  $\rho$  Based on HVS-I Data for Haplogroups I (A), W (B), and X (C)

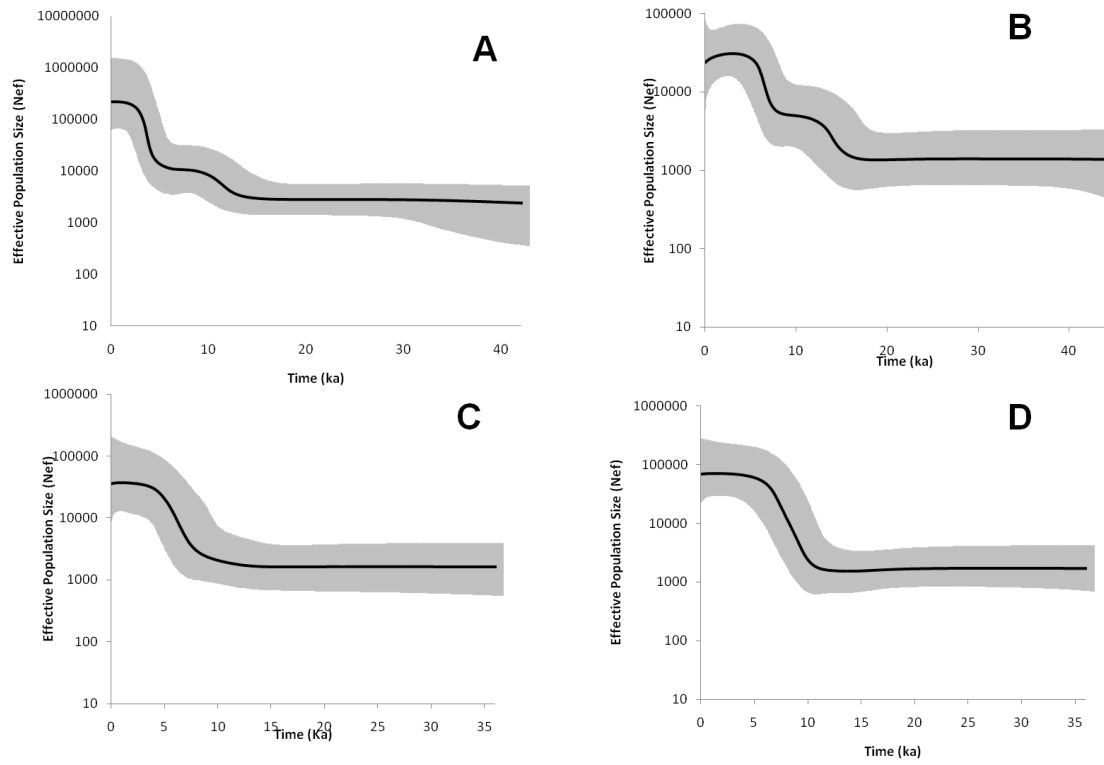

Figure S6. Bayesian Skyline Plot Indicating Hypothetical Effective Population Size through Time Based on Data from Haplogroups N1 (A), X (B), N2 (C), and N2 without W Finns (D)
